# Supplementary material for: Paper-Based Exosomal MicroRNA-21 Detection for Wound Monitoring: A Proof of Concept and Clinical Validation Trial Study
Source: MDPI journal article supplement (doi:10.3390/ijms24129822), 2023-06-06
Supplement: s1 [file s1]

**Table S1. Expression levels of miR-21 and EGF before and after surgery.**

| Patient | Exosomal miR-21 (Ct) |              | EGF (pg/mL) |              | Clinical outcomes |
|---------|----------------------|--------------|-------------|--------------|-------------------|
|         | Pre-surgery          | Post-surgery | Pre-surgery | Post-surgery |                   |
| 1       | 29.31                | 30.11        | 38.04       | 34.28        | Improving         |
| 2       | 27.63                | 26.34        | 14.01       | 39.6         | Worsening         |
| 3       | 30.3                 | 27.2         | 20.13       | 48.46        | Worsening         |
| 4       | 32.2                 | 28.91        | 14.31       | 50.43        | Worsening         |
| 5       | 26.84                | 26.33        | 15.62       | 42.31        | Worsening         |
| 6       | 28.76                | 29.59        | 111.85      | 32.14        | Improving         |
| 7       | 29.78                | 30.05        | 24.98       | 20.35        | Improving         |
| 8       | 30.01                | 29.99        | 3.91        | 5.18         | Stationary        |
| 9       | 28.87                | 29.77        |             |              | Improving         |
| 10      | 30.72                | 31.53        |             |              | Improving         |
| 11      | 29.44                | 31.53        |             |              | Improving         |
| 12      | 30.67                | 31.66        |             |              | Improving         |
| 13      | 30                   | 31.48        |             |              | Improving         |
